# Supplementary material for: Response of Spider and Epigaeic Beetle Assemblages to Overwinter Planting Regimes and Surrounding Landscape Compositions
Source: MDPI journal article supplement (doi:10.3390/insects14120951), 2023-12-15
Supplement: s1 [file s1]

## Electronic supplementary materials

# Response of Spider and Epigaeic Beetle Assemblages to Overwinter Planting Regimes and Surrounding Landscape Compositions

Hainan Chong <sup>1,2</sup>, Yulin Zhu <sup>2,3</sup>, Qian Lai <sup>2</sup>, Song Wu <sup>2</sup>, Ting Jiang <sup>2</sup>, Dandan Zhang<sup>1,\*</sup>, and Haijun Xiao <sup>1,2\*</sup>

1 School of Grassland Science, Beijing Forestry University, Beijing, 100083, China; chonghn15@bjfu.edu.cn.

2 Institute of Entomology, Jiangxi Agricultural University, Nanchang, 330045, China; zhuy10821@163.com (Y.Z.); ggjopj@hotmail.com (Q.L.); w15179282987@hotmail.com (S.W.); jiang-ting0315@126.com (T.J.)

3 Institute of Biological Resources, Jiangxi Academy of Sciences, Nanchang 330096, China;

\* Correspondence: zhangdandan@bjfu.edu.cn(D.Z.); hjxiao@bjfu.edu.cn (H.X.)

**Table S1.** Species list of spiders and carabids with diet (P = predatory; O = omnivorous), body size, ballooning or no ballooning (ballooning = 1; no ballooning = 0), hunting strategy (H = ground hunter; W = web building weaver) and numbers of individuals in 2019 and 2020.

| Species Code | Order   | Family      | Species combined                 | Guild<br>P=Predators, O=Omnivory | Body Size<br>mm: base on female species | Ballooning<br>0 = No ballooning;<br>1 = Ballooning | Hunting strategy<br>H=ground hunter, W=web building weaver | 2019(N) | 2020(N) | Reference |
|--------------|---------|-------------|----------------------------------|----------------------------------|-----------------------------------------|----------------------------------------------------|------------------------------------------------------------|---------|---------|-----------|
| SP01         | Araneae | Lycosidae   | <i>Pardosa pseudoannulata</i>    | P                                | 8                                       | 0                                                  | H                                                          | 204     | 296     | [1,2]     |
| SP02         | Araneae | Ctenidae    | <i>Anahita fauna</i>             | P                                | NA                                      | NA                                                 | NA                                                         | 4       | 3       | NA        |
| SP03         | Araneae | Theridiidae | <i>Steatoda cavernicola</i>      | P                                | 6.3                                     | 0                                                  | W                                                          | 1       | 0       | [1,3]     |
| SP04         | Araneae | Lycosidae   | <i>Pardosa.sp</i>                | P                                | NA                                      | NA                                                 | NA                                                         | 377     | 194     | NA        |
| SP05         | Araneae | Agelenidae  | <i>Spiricoelotes zonatus</i>     | P                                | 6                                       | 0                                                  | W                                                          | 3       | 0       | [1,3]     |
| SP06         | Araneae | Pisauridae  | <i>Pisauridae sp.</i>            | P                                | NA                                      | NA                                                 | NA                                                         | 6       | 0       | NA        |
| SP07         | Araneae | Nesticidae  | <i>Nesticella mogera</i>         | P                                | 2.6                                     | 1                                                  | W                                                          | 96      | 2       | [1,4]     |
| SP08         | Araneae | Agelenidae  | <i>Iwogumoa illustrata</i>       | P                                | 6.8                                     | 0                                                  | W                                                          | 1       | 0       | [1,5]     |
| SP09         | Araneae | Lycosidae   | <i>Pardosa laura</i>             | P                                | 5.1                                     | 0                                                  | H                                                          | 1       | 1       | [1,6]     |
| SP10         | Araneae | Thomisidae  | <i>Xysticus hedini</i>           | P                                | 6.06                                    | 1                                                  | H                                                          | 10      | 0       | [2,7,8]   |
| SP11         | Araneae | Linyphiidae | <i>Erigone atra</i>              | P                                | 2.4                                     | 1                                                  | W                                                          | 2       | 0       | [6,8]     |
| SP12         | Araneae | Thomisidae  | <i>Xysticus sp.</i>              | P                                | NA                                      | NA                                                 | NA                                                         | 23      | 0       | NA        |
| SP13         | Araneae | Salticidae  | <i>Bianor angulosus</i>          | P                                | 5.05                                    | 1                                                  | H                                                          | 1       | 0       | [6,9]     |
| SP14         | Araneae | Clubionidae | <i>Castianeira flavimaculata</i> | P                                | 7.5                                     | 0                                                  | H                                                          | 2       | 1       | [1,6]     |
| SP15         | Araneae | Ctenidae    | <i>Latouchia</i>                 | P                                | NA                                      | NA                                                 | NA                                                         | 1       | 0       | NA        |
| SP16         | Araneae | Lycosidae   | <i>Trochosa ruricoides</i>       | P                                | 10                                      | 0                                                  | H                                                          | 46      | 8       | [1,2]     |
| SP17         | Araneae | Linyphiidae | <i>Erigone prominens</i>         | P                                | 1.7                                     | 1                                                  | W                                                          | 726     | 1195    | [6,8]     |
| SP18         | Araneae | Oxyopidae   | <i>Oxyopidae sp.</i>             | P                                | NA                                      | NA                                                 | NA                                                         | 7       | 0       | NA        |
| SP19         | Araneae | Lycosidae   | <i>Pirata subpiraticus</i>       | P                                | 6.2                                     | 0                                                  | H                                                          | 4       | 0       | [1,6]     |
| SP20         | Araneae | Gnaphosidae | <i>Gnaphosa sp.</i>              | P                                | NA                                      | NA                                                 | NA                                                         | 14      | 9       | NA        |
| SP21         | Araneae | Linyphiidae | <i>Ummeliata insecticeps</i>     | P                                | 2.63                                    | 1                                                  | W                                                          | 2895    | 7563    | [6,8]     |
| SP22         | Araneae | Theridiidae | <i>Enoplognatha diodonta</i>     | P                                | 9.4                                     | 0                                                  | W                                                          | 273     | 165     | [1,10]    |

|      |            |                 |                                   |   |       |    |    |     |     |          |
|------|------------|-----------------|-----------------------------------|---|-------|----|----|-----|-----|----------|
| SP23 | Araneae    | Araneidae       | <i>Singa pygmaea</i>              | P | 3.1   | 1  | W  | 116 | 301 | [3,8]    |
| SP24 | Araneae    | Lycosidae       | <i>Piratula procurva</i>          | P | 5.0   | 0  | W  | 239 | 232 | [1,2]    |
| SP25 | Araneae    | Salticidae      | <i>Irura longiochelicerca</i>     | P | 5.90  | 1  | H  | 1   | 0   | [6,11]   |
| SP26 | Araneae    | Gnaphosidae     | <i>Zelotes asiaticus</i>          | P | 6.20  | 0  | H  | 5   | 0   | [1,2,6]  |
| SP27 | Araneae    | Agelenidae      | <i>Allagelena</i>                 | P | NA    | NA | NA | 1   | 0   | NA       |
| SP28 | Araneae    | Hahniidae       | <i>Hahnia zhejiangensis</i>       | P | 2.90  | 1  | W  | 15  | 3   | [1,12]   |
| SP29 | Araneae    | Lycosidae       | <i>Wadicosa fidelis</i>           | P | 7.20  | 0  | H  | 3   | 2   | [1,2,13] |
| SP30 | Araneae    | Linyphiidae SP1 | <i>Linyphiidae sp1.</i>           | P | NA    | NA | NA | 9   | 3   | NA       |
| SP31 | Araneae    | Linyphiidae SP2 | <i>Linyphiidae sp2.</i>           | P | NA    | NA | NA | 14  | 5   | NA       |
| SP32 | Araneae    | Linyphiidae SP3 | <i>Linyphiidae sp3.</i>           | P | NA    | NA | NA | 22  | 40  | NA       |
| SP33 | Araneae    | Linyphiidae SP4 | <i>Linyphiidae sp4.</i>           | P | NA    | NA | NA | 11  | 25  | NA       |
| SP34 | Araneae    | Erigonidae      | <i>Erigonidium graminicolum</i>   | P | 3.60  | 1  | W  | 215 | 158 | [6]      |
| SP35 | Coleoptera | Carabidae       | <i>Pterostichus liodactylus</i>   | P | 8.26  | —  | —  | 56  | 179 | [14]     |
| SP36 | Coleoptera | Carabidae       | <i>Agonum japonicum</i>           | P | 9.61  | —  | —  | 422 | 235 | [15]     |
| SP37 | Coleoptera | Carabidae       | <i>Agonum chalcomus</i>           | P | 9.09  | —  | —  | 59  | 425 | [16]     |
| SP38 | Coleoptera | Carabidae       | <i>Harpalus sinicus</i>           | O | 10.00 | —  | —  | 4   | 12  | [1]      |
| SP39 | Coleoptera | Carabidae       | <i>Synuchus arcuaticollis</i>     | P | 6.25  | —  | —  | 19  | 0   | [17]     |
| SP40 | Coleoptera | Carabidae       | <i>Bembidion perditum</i>         | P | 5.29  | —  | —  | 53  | 0   | [18]     |
| SP41 | Coleoptera | Carabidae       | <i>Stenolophus castaneipennis</i> | P | 7.37  | —  | —  | 24  | 40  | [19]     |
| SP42 | Coleoptera | Carabidae       | <i>Stenolophus kurosai</i>        | P | 6.70  | —  | —  | 8   | 0   | [20]     |
| SP43 | Coleoptera | Carabidae       | <i>Loxoncus circumcinctus</i>     | P | 10.03 | —  | —  | 4   | 0   | [21]     |
| SP44 | Coleoptera | Carabidae       | <i>Amara congrua</i>              | O | 9.62  | —  | —  | 4   | 1   | [22,23]  |
| SP45 | Coleoptera | Carabidae       | <i>Pterostichus microcephalus</i> | P | 12.28 | —  | —  | 3   | 0   | [24]     |
| SP46 | Coleoptera | Carabidae       | <i>Harpalus chalcentus</i>        | O | 14.65 | —  | —  | 1   | 0   | [24]     |

**Table S2.** Landscape cover (%) and landscape diversity (Shannon diversity index) at 1000 m radius across 13 sites.

| sites   |         | Fallow | Oilseed rape | Grassland | Forest | Ridge | SNH  | Shannon diversity |
|---------|---------|--------|--------------|-----------|--------|-------|------|-------------------|
| 13sites | Max     | 0.56   | 0.11         | 0.19      | 0.71   | 0.08  | 0.77 | 0.77              |
|         | Min     | 0.09   | 0.00         | 0.01      | 0.07   | 0.01  | 0.16 | 1.18              |
|         | Average | 0.29   | 0.04         | 0.08      | 0.38   | 0.03  | 0.50 | 0.50              |
| S01     | —       | 0.42   | 0.01         | 0.08      | 0.20   | 0.05  | 0.33 | 1.88              |
| S02     | —       | 0.56   | 0.06         | 0.01      | 0.07   | 0.08  | 0.16 | 1.59              |
| S03     | —       | 0.33   | 0.11         | 0.19      | 0.18   | 0.05  | 0.41 | 2.19              |
| S04     | —       | 0.33   | 0.07         | 0.08      | 0.18   | 0.04  | 0.31 | 2.12              |
| S05     | —       | 0.11   | 0.00         | 0.06      | 0.70   | 0.02  | 0.77 | 1.18              |
| S06     | —       | 0.35   | 0.03         | 0.05      | 0.42   | 0.05  | 0.53 | 1.59              |
| S07     | —       | 0.28   | 0.04         | 0.08      | 0.40   | 0.01  | 0.49 | 2.09              |
| S08     | —       | 0.51   | 0.03         | 0.10      | 0.17   | 0.05  | 0.32 | 1.72              |
| S09     | —       | 0.10   | 0.02         | 0.11      | 0.50   | 0.02  | 0.64 | 1.86              |
| S10     | —       | 0.31   | 0.01         | 0.04      | 0.56   | 0.02  | 0.62 | 1.24              |
| S11     | —       | 0.32   | 0.01         | 0.15      | 0.28   | 0.04  | 0.48 | 2.12              |

|     |   |      |      |      |      |      |      |      |
|-----|---|------|------|------|------|------|------|------|
| S12 | — | 0.09 | 0.09 | 0.07 | 0.60 | 0.01 | 0.68 | 1.57 |
| S13 | — | 0.09 | 0.04 | 0.04 | 0.71 | 0.01 | 0.76 | 1.26 |

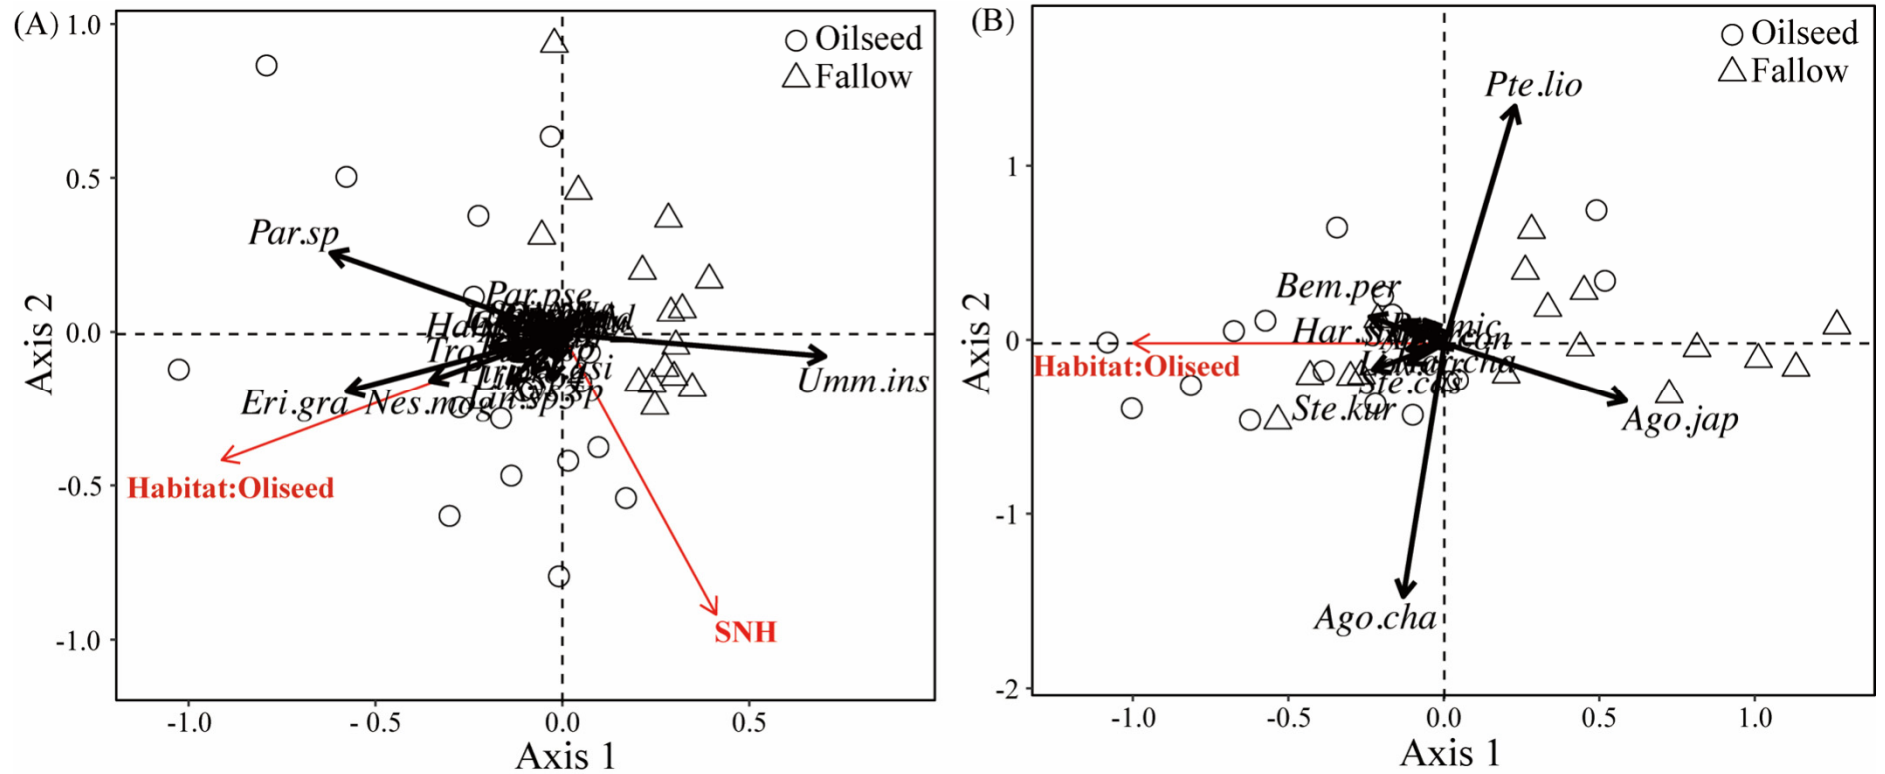

**Figure S1.** RDA ordination diagrams of spiders (A) and carabids (B) in the FR and the OSR, significant landscape variables and all indicator species (crosses) along the first and second RDA axis. 1, *Pardosa pse*, *Pardosa pseudoannulata*; 2, *Anahita fau*, *Anahita fauna*; 3, *Steatoda cav*, *Steatoda cavernicola*; 4, *Pardosa.sp*; 5, *Spiricoelotes zon*, *Spiricoelotes zonatus*; 6, *Pisauridae*; 7, *Nesticella mog*, *Nesticella mogera*; 8, *Iwogumoa ill*, *Iwogumoa illustrata*; 9, *Pardosa lau*, *Pardosa laura*; 10, *Xysticus hed*, *Xysticus hedin*; 11, *Erigone atr*, *Erigone atra*; 12, *Xysticus*; 13, *Bianor ang*, *Bianor angulosus*; 14, *Castianeira fla*, *Castianeira flavimaculata*; 15, *Latouchia*; 16, *Trochosa rur*, *Trochosa ruricoides*; 17, *Erigone pro*,

*Erigone prominens*; 18, *Oxyopidae*; 18, *Pirata sub*, *Pirata subpiraticus*; 19, *Pirata sub*, *Pirata subpiraticus*; 20, *Gnaphosa*; 21, *Ummeliata ins*, *Ummeliata insecticeps*; 22, *Enoplognatha dio*, *Enoplognatha diodonta*; 23, *Singa pyg*, *Singa pygmaea*; 24, *Piratula pro*, *Piratula procurva*; 25, *Irura lon*, *Irura longiochelicerca*; 26, *Zelotes asi*, *Zelotes asiaticus*; 27, *Allagelena*; 28, *Hahnia zhe*, *Hahnia zhejiangensis*; 29, *Wadicosa fid*, *Wadicosa fidelis*; 30, *Linyphiidae sp1*; 31, *Linyphiidae sp2*; 32, *Linyphiidae sp3*; 33, *Linyphiidae sp4*; 34, *Erigonidium gra*, *Erigonidium graminicolum*; 35, *Pterostichus lio*, *Pterostichus liodactylus*; 36, *Agonum jap*, *Agonum japonicum*; 37, *Agonum cha*, *Agonum chalcomus*; 38, *Harpalus sin*, *Harpalus sinicus*; 39, *Synuchus arc*, *Synuchus arcuaticollis*; 40, *Bembidion per*, *Bembidion perditum*; 41, *Stenolophus cas*, *Stenolophus castaneipennis*; 42, *Stenolophus kur*, *Stenolophus kurosai*; 43, *Loxoncus cir*, *Loxoncus circumcinctus*; 44, *Amara con*, *Amara congrua*; 45, *Pterostichus mic*, *Pterostichus microcephalus*; 46, *Harpalus cha*, *Harpalus chalcatus*.

## supplementary reference

1. Duan, M.; Liu, Y.; Li, X.; Wu, P.; Hu, W.; Zhang, F.; Shi, H.; Yu, Z.; Baudry, J. Effect of present and past landscape structures on the species richness and composition of ground beetles (Coleoptera: Carabidae) and spiders (Araneae) in a dynamic landscape. *Landscape Urban Plan.* **2019**, 192, 103649. <https://doi.org/10.1016/2019.103649>.
2. Zhang, Z.; Wang, L. *Chinese Spiders Illustrated*; Chongqing University Press: Chongqing, China, 2017; p. 924.
3. Chen, Z.; Zhang, Z. *Zoology of Zhejiang Arachnis*; Zhejiang Science and Technology Press: Hangzhou, China, 1991.
4. Kielhorn, K.H. First records of *Spermophora kerinci*, *Nesticella mogera* and *Pseudanapis aloha* on the European mainland (Araneae: Pholcidae, Nesticidae, Anapidae). *Arachnol. Mitt.* **2009**, 37, 31-34. <https://doi.org/10.5431/aramit3706>.
5. Zhu, M.; Wang, X.; Zhang, Z. *Fauna Sinica, Invertebrata, Arachnida, Araneae, Agelenidae and Amaurobiidae.*; Science Press: Beijing, China, 2017; p. 727.  
<https://doi.org/10.1079/ber2004350>.
6. Song, D.; Zhu, M.; Chen, J. *Spiders in Agricultural Areas of China*; China Agriculture Press: Beijing, China, 1987.
7. Song, D.; Zhu, M. *Chinese Zoology: Arachnida, Arachnidea: Thomisidae, Philodromidae*; Science Press: Beijing, China, 1998.
8. Bell, J.; Bohan, D.; Shaw, E.; Weyman, G. Ballooning dispersal using silk: world fauna, phylogenies, genetics and models. *Bull. Entomol. Res.* **2005**, 95, 69-114.  
<https://doi.org/10.1079/ber2004350>.
9. Babu, N.; Caleb, J.T.; Gopalakrishnan, P. A new distribution record of *Bianor angulosus* (Karsch, 1879)(Araneae: Salticidae) from Kerala, India. *J Threat Taxa.* **2021**, 13, 19177-19180. <https://doi.org/10.11609/jott.7069.13.8.19177-19180>.
10. Zhu, M. *Fauna Sinica, Arachnida, Araneae, Theridiidae*; Science Press: Beijing, China, 1998.
11. Peng, X.; Yin, C. Five new species of the genus *Kinhia* from China (Araneae: Salticidae). *Acta Zootaxonomica Sinica.* **1991**, 16, 35-47.



12. Song, D.; Zheng, S. Two new species of Hahnia (Araneae: Hahniidea) from ZheJiang province, China. *Sinozoologia*. **1982**, 2, 81-84.
13. Kronestedt, T.; Zyuzin, A.A. Fixation of *Lycosa fidelis* O. Pickard-Cambridge, 1872 as the type species for the genus *Wadicosa* Zyuzin, 1985 (Araneae: Lycosiadae), with a redescription of the species. *Contributions to Natural History*. **2009**, 12, 813-828.
14. Shi, H. *Systematic classification studies of Pterostichus in China*. Beijing Forest University, Beijing, China, 2013.
15. Smetanin, A. On the insect fauna of the Kichiga River basin, northeastern Kamchatka. *Entomol. Rev.* **2013**, 93, 160-173, <https://doi.org/10.1134/S0013873813020048>.
16. Yamazaki, K.; Sugiura, S.; Kawamura, K. Ground beetles (Coleoptera: Carabidae) and other insect predators overwintering in arable and fallow fields in central Japan. *Appl. Entomol. Zool.* **2003**, 38, 449-459. <https://doi.org/10.1303/aez.2003.449>.
17. Kang, B.; Lee, J.-H.; Park, J.-K. Carabid beetle species as a biological indicator for different habitat types of agricultural landscapes in Korea. *J. Ecol. Environ.* **2012**, 35, 35-39. <http://dx.doi.org/10.5141/JEFB.2012.006>.
18. Chen, S. Search for common genera of Carabid in China. *Natural Enemies of Insects*. **1984**, 6, 165-181.
19. Cai, C.; Zhu, S.; Pan, Y. *Atlas of insects from Beijing Hanshiqiao Wetland*; Science Press: Beijing, China, 2019.
20. Bates, H. Descriptions of new genera and species of Geodephayous Coleoptera, from China. *Trans. R. Entomol. Soc.* **1873**, 21, 323-334. <https://doi.org/10.1111/j.1365-2311.1873.tb00644.x>.
21. Chong, H. *The effect of farmland landscape pattern on diversity and density of over-wintering spiders and carabids*. Jiangxi Agricultural University, Nanchang, 2021.
22. Sasakawa, K.; Ikeda, H.; Kubota, T. Feeding ecology of granivorous carabid larvae: a stable isotope analysis. *J. Appl. Entomol.* **2010**, 134, 116-122. <https://doi.org/10.1111/j.1439-0418.2009.01451.x>.
23. Sasakawa, K. Laboratory studies on larval food habits of two syntopic, related, granivorous ground beetles *Amara chalcites* and *A. congrua* (Coleoptera: Carabidae): a

comparison with stable isotope analysis. *Appl. Entomol. Zool.* **2011**, *46*, 511-518.

24. Zhang, X.; Axmacher, J.C.; Wu, P.; Song, X.; Yu, Z.; Liu, Y. The taxon-and functional trait-dependent effects of field margin and landscape composition on predatory arthropods in wheat fields of the North China Plain. *Insect Conserv Diver.* **2020**, *13*, 328-339. <https://doi.org/10.1111/icad.12403>.
